# Supplementary material for: Partition of solutes into wet and dry ethers; an LFER analysisElectronic supplementary information (ESI) available: tables of solute descriptors and log P values. Values of log Kw and L. See http://www.rsc.org/suppdata/nj/b3/b303016d/
Source: Royal Society of Chemistry journal article supplement (doi:10.1039/b303016d), 2003-01-01
Supplement: b303016d.pdf [file b303016d.pdf]

**Table S1** Solute descriptors, and values of log P for partition between water and wet diethyl ether.

| Solute              | E     | S    | A    | B <sup>0</sup> | V      | Log P |
|---------------------|-------|------|------|----------------|--------|-------|
| Radon               | 0.000 | 0.00 | 0.00 | 0.00           | 0.3840 | 1.72  |
| Chlorocyclohexane   | 0.448 | 0.48 | 0.00 | 0.10           | 0.9678 | 3.15  |
| Bromocyclohexane    | 0.615 | 0.54 | 0.00 | 0.16           | 1.0204 | 3.32  |
| Iodoethane          | 0.640 | 0.40 | 0.00 | 0.15           | 0.6486 | 2.45  |
| ethylether          | 0.041 | 0.25 | 0.00 | 0.45           | 0.7309 | 1.00  |
| Propanone           | 0.179 | 0.70 | 0.04 | 0.49           | 0.5470 | -0.21 |
| b-Propiolactone     | 0.351 | 1.50 | 0.00 | 0.39           | 0.4971 | 0.02  |
| Methyl acetate      | 0.142 | 0.64 | 0.00 | 0.45           | 0.6057 | 0.40  |
| Ethyl acetate       | 0.106 | 0.62 | 0.00 | 0.45           | 0.7466 | 0.90  |
| Ethyl fluoroacetate | 0.119 | 1.04 | 0.00 | 0.38           | 0.7643 | 1.65  |
| Acetonitrile        | 0.237 | 0.90 | 0.07 | 0.32           | 0.4042 | -0.22 |
| Ammonia             | 0.139 | 0.39 | 0.16 | 0.56           | 0.2084 | -1.96 |
| Methylamine         | 0.250 | 0.35 | 0.16 | 0.58           | 0.3493 | -1.64 |
| Ethylamine          | 0.236 | 0.35 | 0.16 | 0.61           | 0.4902 | -1.18 |
| Propylamine         | 0.225 | 0.35 | 0.16 | 0.61           | 0.6311 | -0.54 |
| Butylamine          | 0.224 | 0.35 | 0.16 | 0.61           | 0.7720 | 0.11  |
| Isopentylamine      | 0.194 | 0.32 | 0.16 | 0.63           | 0.9129 | 0.30  |
| Hexylamine          | 0.197 | 0.35 | 0.16 | 0.61           | 1.0538 | 1.20  |
| Heptylamine         | 0.197 | 0.35 | 0.16 | 0.61           | 1.1947 | 1.30  |
| Dimethylamine       | 0.189 | 0.30 | 0.08 | 0.66           | 0.4902 | -1.22 |
| Diethylamine        | 0.154 | 0.30 | 0.08 | 0.69           | 0.7720 | -0.28 |

|                            |       |      |      |      |        |       |
|----------------------------|-------|------|------|------|--------|-------|
| Dipropylamine              | 0.124 | 0.30 | 0.08 | 0.69 | 1.0538 | 0.95  |
| Diisobutylamine            | 0.046 | 0.24 | 0.08 | 0.69 | 1.3356 | 2.52  |
| Trimethylamine             | 0.140 | 0.20 | 0.00 | 0.67 | 0.6311 | -0.34 |
| Triethylamine              | 0.101 | 0.15 | 0.00 | 0.79 | 1.0538 | 0.80  |
| Nitrocyclohexane           | 0.441 | 0.97 | 0.00 | 0.31 | 1.0190 | 2.00  |
| Formamide                  | 0.468 | 1.30 | 0.62 | 0.6  | 0.3650 | -2.85 |
| Acetamide                  | 0.460 | 1.30 | 0.54 | 0.68 | 0.5059 | -2.60 |
| Propionamide               | 0.440 | 1.30 | 0.55 | 0.68 | 0.6468 | -1.89 |
| Butanamide                 | 0.420 | 1.30 | 0.56 | 0.68 | 0.7877 | -1.24 |
| N,N-Dimethylformamide      | 0.367 | 1.31 | 0.00 | 0.74 | 0.6468 | -1.62 |
| Acrylamide                 | 0.530 | 1.30 | 0.58 | 0.63 | 0.6038 | -1.55 |
| 2,2,2-Trichloroacetamide   | 0.710 | 0.63 | 0.47 | 0.56 | 0.8731 | 1.08  |
| Urea                       | 0.501 | 1.49 | 0.83 | 0.90 | 0.4648 | -3.33 |
| Tetraethylurea             | 0.274 | 1.00 | 0.00 | 1.04 | 1.5920 | 1.04  |
| Ethyl carbamate            | 0.290 | 0.85 | 0.35 | 0.64 | 0.7055 | -0.19 |
| Formic acid                | 0.300 | 0.79 | 0.72 | 0.34 | 0.3239 | -0.52 |
| Acetic acid                | 0.265 | 0.65 | 0.61 | 0.44 | 0.4648 | -0.30 |
| Propanoic acid             | 0.233 | 0.65 | 0.60 | 0.45 | 0.6057 | 0.13  |
| Butanoic acid              | 0.210 | 0.62 | 0.60 | 0.45 | 0.7466 | 0.66  |
| Pentanoic acid             | 0.205 | 0.60 | 0.60 | 0.45 | 0.8875 | 1.24  |
| 2,2-Dimethylpropanoic acid | 0.170 | 0.54 | 0.60 | 0.50 | 0.8875 | 1.51  |
| Hexanoic acid              | 0.174 | 0.60 | 0.60 | 0.45 | 1.0284 | 1.95  |
| Heptanoic acid             | 0.149 | 0.60 | 0.60 | 0.45 | 1.1693 | 2.26  |
| Propenoic acid             | 0.357 | 0.60 | 0.60 | 0.39 | 0.5627 | 0.36  |

|                         |       |      |      |      |        |       |
|-------------------------|-------|------|------|------|--------|-------|
| Fluoroacetic acid       | 0.230 | 1.08 | 0.81 | 0.34 | 0.4825 | -0.27 |
| Chloroacetic acid       | 0.373 | 1.08 | 0.74 | 0.36 | 0.5870 | 0.41  |
| Dichloroacetic acid     | 0.481 | 1.20 | 0.90 | 0.27 | 0.7100 | 1.24  |
| Trichloroacetic acid    | 0.589 | 1.33 | 0.95 | 0.28 | 0.8320 | 1.57  |
| Succinic acid           | 0.370 | 1.36 | 0.85 | 0.70 | 0.8210 | -0.87 |
| Peracetic acid          | 0.305 | 0.53 | 0.53 | 0.53 | 0.5235 | -0.27 |
| Methanol                | 0.278 | 0.44 | 0.43 | 0.47 | 0.3082 | -0.85 |
| Ethanol                 | 0.246 | 0.42 | 0.37 | 0.48 | 0.4491 | -0.58 |
| Propan-1-ol             | 0.236 | 0.42 | 0.37 | 0.48 | 0.5900 | 0.28  |
| Propan-2-ol             | 0.212 | 0.36 | 0.33 | 0.56 | 0.5900 | -0.19 |
| Butan-1-ol              | 0.224 | 0.42 | 0.37 | 0.48 | 0.7309 | 0.61  |
| 2-Methylpropan-1-ol     | 0.217 | 0.39 | 0.37 | 0.48 | 0.7309 | 0.84  |
| 2-Methylpropan-2-ol     | 0.180 | 0.30 | 0.31 | 0.60 | 0.7309 | 0.34  |
| Pentan-1-ol             | 0.219 | 0.42 | 0.37 | 0.48 | 0.8718 | 1.20  |
| Pentan-2-ol             | 0.195 | 0.36 | 0.33 | 0.56 | 0.8718 | 0.89  |
| Pentan-3-ol             | 0.218 | 0.36 | 0.33 | 0.56 | 0.8718 | 0.96  |
| 2-Methylbutan-1-ol      | 0.219 | 0.39 | 0.37 | 0.48 | 0.8718 | 1.13  |
| 3-Methylbutan-1-ol      | 0.192 | 0.39 | 0.37 | 0.48 | 0.8718 | 1.28  |
| 2-Methylbutan-2-ol      | 0.194 | 0.30 | 0.31 | 0.60 | 0.8718 | 0.64  |
| 3-Methylbutan-2-ol      | 0.194 | 0.33 | 0.33 | 0.56 | 0.8718 | 0.94  |
| 2,2-Dimethylpropan-1-ol | 0.220 | 0.36 | 0.37 | 0.53 | 0.8718 | 1.21  |
| Hexan-1-ol              | 0.210 | 0.42 | 0.37 | 0.48 | 1.0127 | 1.80  |
| Hexan-2-ol              | 0.187 | 0.36 | 0.33 | 0.56 | 1.0127 | 1.58  |
| 2-Methylpentan-2-ol     | 0.169 | 0.30 | 0.31 | 0.60 | 1.0127 | 1.16  |

|                        |       |      |      |      |        |       |
|------------------------|-------|------|------|------|--------|-------|
| 4-Methylpentan-2-ol    | 0.167 | 0.33 | 0.33 | 0.56 | 1.0127 | 1.47  |
| 3-Methylpentan-3-ol    | 0.210 | 0.30 | 0.31 | 0.60 | 1.0127 | 1.10  |
| 3,3-Dimethylbutan-2-ol | 0.193 | 0.30 | 0.33 | 0.56 | 1.0127 | 1.56  |
| Heptan-1-ol            | 0.211 | 0.42 | 0.37 | 0.48 | 1.1536 | 2.40  |
| 2-Methylhexan-2-ol     | 0.163 | 0.30 | 0.31 | 0.60 | 1.1536 | 1.79  |
| 3-Ethylpentan-3-ol     | 0.234 | 0.30 | 0.31 | 0.60 | 1.1536 | 1.63  |
| Octan-1-ol             | 0.199 | 0.42 | 0.37 | 0.48 | 1.2950 | 2.91  |
| Octan-2-ol             | 0.158 | 0.36 | 0.33 | 0.56 | 1.2950 | 2.87  |
| Cyclopentanol          | 0.427 | 0.54 | 0.32 | 0.56 | 0.7630 | 0.74  |
| Cyclohexanol           | 0.460 | 0.54 | 0.32 | 0.57 | 0.9040 | 0.95  |
| Cycloheptanol          | 0.513 | 0.54 | 0.32 | 0.58 | 1.0450 | 1.22  |
| Cyclooctanol           | 0.566 | 0.54 | 0.32 | 0.58 | 1.1859 | 1.70  |
| Prop-2-en-1-ol         | 0.342 | 0.46 | 0.38 | 0.48 | 0.5470 | -0.12 |
| 2-Methoxyethanol       | 0.269 | 0.50 | 0.30 | 0.84 | 0.6487 | -1.21 |
| 2-Ethoxyethanol        | 0.237 | 0.52 | 0.31 | 0.81 | 0.7896 | -0.70 |
| Propan-1,2-diol        | 0.373 | 0.90 | 0.58 | 0.80 | 0.6487 | -1.74 |
| Propan-1,3-diol        | 0.397 | 0.91 | 0.77 | 0.85 | 0.6487 | -2.00 |
| Butan-1,3-diol         | 0.377 | 0.90 | 0.70 | 0.83 | 0.7896 | -1.38 |
| dl-Butan-2,3-diol      | 0.341 | 0.93 | 0.61 | 0.88 | 0.7896 | -1.54 |
| Butan-1,4-diol         | 0.395 | 0.93 | 0.72 | 0.90 | 0.7986 | -1.72 |
| Pentan-1,5-diol        | 0.388 | 0.95 | 0.72 | 0.91 | 0.9305 | -1.26 |
| Hexan-1,6-diol         | 0.385 | 0.95 | 0.75 | 0.92 | 1.0714 | -0.92 |
| Decan-1,10-diol        | 0.370 | 0.95 | 0.75 | 0.92 | 1.6350 | 1.32  |
| Glycerol               | 0.512 | 0.90 | 0.70 | 1.14 | 0.7074 | -3.18 |

|                                |       |      |      |      |        |       |
|--------------------------------|-------|------|------|------|--------|-------|
| Erythritol                     | 0.620 | 1.20 | 0.70 | 1.40 | 0.9070 | -4.00 |
| 2-Aminoethanol                 | 0.458 | 0.70 | 0.52 | 0.90 | 0.5489 | -2.89 |
| Hydrogen sulfide               | 0.350 | 0.37 | 0.08 | 0.07 | 0.2721 | 0.95  |
| Thiourea                       | 0.840 | 0.82 | 0.77 | 0.87 | 0.5696 | -2.20 |
| Dimethyl methanephosphonate    | 0.220 | 0.80 | 0.00 | 1.05 | 0.9120 | -1.49 |
| Dimethyl dichlorovinylphosphon | 1.224 | 1.02 | 0.00 | 0.92 | 1.2547 | 1.36  |
| Trichlorfon                    | 1.039 | 1.52 | 0.29 | 1.19 | 1.4788 | -0.29 |
| Tetracaine                     | 1.120 | 0.92 | 0.34 | 1.33 | 2.2585 | 3.04  |
| Benzene                        | 0.610 | 0.52 | 0.00 | 0.14 | 0.7164 | 2.45  |
| o-Xylene                       | 0.663 | 0.56 | 0.00 | 0.16 | 0.9982 | 3.43  |
| m-Xylene                       | 0.623 | 0.52 | 0.00 | 0.16 | 0.9982 | 3.46  |
| Phenanthrene                   | 2.055 | 1.29 | 0.00 | 0.29 | 1.4544 | 4.84  |
| 1,3-Dichlorobenzene            | 0.847 | 0.73 | 0.00 | 0.02 | 0.9612 | 3.77  |
| 1,4-Dichlorobenzene            | 0.825 | 0.75 | 0.00 | 0.02 | 0.9612 | 3.79  |
| Iodobenzene                    | 1.188 | 0.82 | 0.00 | 0.12 | 0.9746 | 3.60  |
| Methylphenylether              | 0.708 | 0.75 | 0.00 | 0.29 | 0.9160 | 2.39  |
| 1,2-Dimethoxybenzene           | 0.832 | 0.97 | 0.00 | 0.65 | 1.1160 | 1.83  |
| Benzaldehyde                   | 0.820 | 1.00 | 0.00 | 0.39 | 0.8730 | 1.51  |
| 3-Methoxybenzaldehyde          | 0.921 | 1.20 | 0.00 | 0.48 | 1.0726 | 2.06  |
| 4-Methoxybenzaldehyde          | 0.920 | 1.35 | 0.00 | 0.47 | 1.0726 | 1.74  |
| 3,4-Dimethoxybenzaldehyde      | 1.020 | 1.60 | 0.00 | 0.74 | 1.2722 | 1.10  |
| Acetophenone                   | 0.818 | 1.01 | 0.00 | 0.48 | 1.0139 | 1.62  |
| 3-Methoxyacetophenone          | 0.902 | 1.56 | 0.00 | 0.53 | 1.2135 | 2.14  |
| 4-Methoxyacetophenone          | 0.916 | 1.58 | 0.00 | 0.53 | 1.2135 | 2.15  |

|                       |       |      |      |      |        |       |
|-----------------------|-------|------|------|------|--------|-------|
| 1,4-Benzoquinone      | 0.750 | 0.62 | 0.00 | 0.76 | 0.7908 | -0.51 |
| Benzonitrile          | 0.742 | 1.11 | 0.00 | 0.33 | 0.8711 | 1.66  |
| Aniline               | 0.955 | 0.96 | 0.26 | 0.50 | 0.8162 | 0.64  |
| 4-Chloroaniline       | 1.060 | 1.13 | 0.30 | 0.35 | 0.9390 | 1.66  |
| 2-Nitroaniline        | 1.180 | 1.37 | 0.30 | 0.36 | 0.9904 | 1.95  |
| 3-Nitroaniline        | 1.200 | 1.71 | 0.40 | 0.35 | 0.9904 | 1.19  |
| 4-Nitroaniline        | 1.220 | 1.83 | 0.45 | 0.38 | 0.9904 | 1.48  |
| Ethyl 4-aminobenzoate | 1.034 | 1.20 | 0.32 | 0.76 | 1.3133 | 0.87  |
| o-Phenylenediamine    | 1.260 | 1.40 | 0.24 | 0.73 | 0.9160 | -0.06 |
| 2-Nitrotoluene        | 0.866 | 1.11 | 0.00 | 0.28 | 1.0315 | 2.65  |
| 4-Nitrotoluene        | 0.870 | 1.11 | 0.00 | 0.28 | 1.0315 | 2.53  |
| 1,2-Dinitrobenzene    | 1.170 | 1.70 | 0.00 | 0.38 | 1.0648 | 1.61  |
| 1,3-Dinitrobenzene    | 1.150 | 1.60 | 0.00 | 0.47 | 1.0648 | 1.45  |
| 1,4-Dinitrobenzene    | 1.130 | 1.63 | 0.00 | 0.46 | 1.0648 | 1.51  |
| Benzamide             | 0.990 | 1.50 | 0.49 | 0.67 | 0.9728 | -0.22 |
| Acetanilide           | 0.900 | 1.39 | 0.48 | 0.67 | 1.1137 | 0.48  |
| Phthalimide           | 1.183 | 2.09 | 0.40 | 0.42 | 1.0208 | 1.03  |
| Procaine              | 1.140 | 1.67 | 0.32 | 1.36 | 1.9767 | 1.80  |
| Benzoic acid          | 0.730 | 0.90 | 0.59 | 0.40 | 0.9317 | 1.30  |
| 2-Chlorobenzoic acid  | 0.840 | 0.90 | 0.70 | 0.43 | 1.0541 | 2.14  |
| 4-Chlorobenzoic acid  | 0.840 | 0.97 | 0.63 | 0.28 | 1.0541 | 1.62  |
| 2-Nitrobenzoic acid   | 0.990 | 1.10 | 0.72 | 0.65 | 1.1059 | 1.59  |
| 3-Nitrobenzoic acid   | 0.990 | 1.08 | 0.76 | 0.52 | 1.1059 | 1.31  |
| 2-Aminobenzoic acid   | 1.075 | 1.63 | 0.69 | 0.47 | 1.0315 | 1.43  |

|                       |       |      |      |      |        |      |
|-----------------------|-------|------|------|------|--------|------|
| 4-Aminobenzoic acid   | 1.075 | 1.57 | 0.90 | 0.65 | 1.0315 | 0.88 |
| Acetylsalicylic acid  | 0.781 | 0.80 | 0.49 | 1.00 | 1.2879 | 1.15 |
| Phenylacetic acid     | 0.730 | 0.97 | 0.60 | 0.61 | 1.0726 | 1.57 |
| Phthalic acid         | 0.850 | 1.60 | 0.82 | 0.75 | 1.1470 | 0.20 |
| Phenol                | 0.805 | 0.89 | 0.60 | 0.30 | 0.7751 | 1.12 |
| 2-Chlorophenol        | 0.853 | 0.88 | 0.32 | 0.31 | 0.8975 | 1.58 |
| 2,4-Dichlorophenol    | 0.960 | 0.84 | 0.53 | 0.19 | 1.0199 | 2.30 |
| 2-Methoxyphenol       | 0.837 | 0.91 | 0.22 | 0.52 | 0.9747 | 1.36 |
| 3-Methoxyphenol       | 0.879 | 1.17 | 0.59 | 0.39 | 0.9747 | 2.08 |
| 4-Methoxyphenol       | 0.900 | 1.17 | 0.57 | 0.48 | 0.9747 | 1.47 |
| 3-Hydroxybenzaldehyde | 0.990 | 1.37 | 0.74 | 0.40 | 0.9317 | 1.39 |
| 4-Hydroxybenzaldehyde | 1.010 | 1.54 | 0.85 | 0.37 | 0.9317 | 1.10 |
| 3-Hydroxyacetophenone | 0.980 | 1.35 | 0.72 | 0.55 | 1.0726 | 1.33 |
| 4-Hydroxyacetophenone | 1.010 | 1.51 | 0.76 | 0.54 | 1.0726 | 1.12 |
| 3-Aminophenol         | 1.130 | 1.15 | 0.65 | 0.78 | 0.8749 | 0.11 |
| 2-Nitrophenol         | 1.015 | 1.05 | 0.05 | 0.37 | 0.9493 | 2.18 |
| 3-Nitrophenol         | 1.050 | 1.57 | 0.79 | 0.23 | 0.9493 | 2.20 |
| 4-Nitrophenol         | 1.070 | 1.72 | 0.82 | 0.26 | 0.9493 | 1.28 |
| 2,4-Dinitrophenol     | 1.200 | 1.49 | 0.09 | 0.56 | 1.1235 | 1.40 |
| 2-Hydroxybenzoic acid | 0.890 | 0.84 | 0.71 | 0.38 | 0.9904 | 2.37 |
| 3-Hydroxybenzoic acid | 0.910 | 0.88 | 0.86 | 0.58 | 0.9904 | 1.32 |
| 4-Hydroxybenzoic acid | 0.930 | 0.90 | 0.81 | 0.56 | 0.9904 | 1.42 |
| Catechol              | 0.970 | 1.10 | 0.88 | 0.47 | 0.8338 | 1.04 |
| Resorcinol            | 0.980 | 1.11 | 1.09 | 0.52 | 0.8338 | 0.62 |

|                                     |       |      |      |      |        |       |
|-------------------------------------|-------|------|------|------|--------|-------|
| Hydroquinone                        | 1.063 | 1.27 | 1.06 | 0.57 | 0.8338 | 0.46  |
| 2-Hydroxybenzamide                  | 1.140 | 1.50 | 0.59 | 0.53 | 1.0315 | 0.96  |
| 3-Hydroxy-4-methoxy<br>benzaldehyde | 1.040 | 1.37 | 0.27 | 0.72 | 1.1313 | 0.82  |
| 2-Methoxy-4-methylphenol            | 0.850 | 0.91 | 0.15 | 0.59 | 1.1156 | 2.52  |
| 3,4,5-Trihydroxybenzoic acid        | 1.290 | 1.45 | 1.62 | 0.85 | 1.1078 | -0.30 |
| 4-Hydroxyacetanilide                | 1.060 | 1.63 | 1.04 | 0.86 | 1.1724 | -0.54 |
| 1,2,3-Trihydroxybenzene             | 1.165 | 1.35 | 1.35 | 0.62 | 0.8925 | 0.23  |
| 1,3,5-Trihydroxybenzene             | 1.355 | 1.12 | 1.40 | 0.82 | 0.8925 | -0.35 |
| 2,6-Dimethoxyphenol                 | 0.840 | 1.41 | 0.13 | 0.71 | 1.1743 | 0.74  |
| Benzyl alcohol                      | 0.803 | 0.87 | 0.39 | 0.56 | 0.9160 | 0.65  |
| 2-Hydroxybenzyl alcohol             | 0.998 | 1.14 | 0.62 | 0.72 | 0.9747 | 0.00  |
| 2-Phenylethanol                     | 0.811 | 0.86 | 0.31 | 0.65 | 1.0569 | 1.18  |
| Chloramphenicol                     | 1.851 | 1.70 | 0.60 | 1.75 | 2.0728 | 0.62  |
| Phenylthiourea                      | 1.250 | 1.72 | 0.49 | 0.78 | 1.1774 | 0.23  |
| N-Methylbenzenesulfonamide          | 1.100 | 1.50 | 0.30 | 0.82 | 1.2380 | 0.80  |
| N,N-Dimethylbenzene<br>sulfonamide  | 1.100 | 1.50 | 0.00 | 0.86 | 1.3789 | 1.16  |
| 2-Furaldehyde                       | 0.690 | 1.13 | 0.00 | 0.45 | 0.6929 | 0.43  |
| Paraldehyde                         | 0.136 | 0.68 | 0.00 | 0.68 | 1.0215 | 0.95  |
| Pyridine                            | 0.631 | 0.84 | 0.00 | 0.47 | 0.6753 | 0.08  |
| 2-Aminopyridine                     | 0.980 | 1.10 | 0.32 | 0.59 | 0.7751 | -0.11 |
| 3-Pyridinecarboxylic acid amid      | 1.010 | 1.09 | 0.63 | 1.00 | 0.9317 | -1.72 |
| Nicotine                            | 0.865 | 0.75 | 0.00 | 1.14 | 1.3710 | 1.08  |



|                           |       |      |      |      |        |       |
|---------------------------|-------|------|------|------|--------|-------|
| Cocaine                   | 1.355 | 1.92 | 0.00 | 1.50 | 2.2977 | 2.14  |
| Atropine                  | 1.188 | 1.94 | 0.36 | 1.64 | 2.2820 | 0.61  |
| 8-Hydroxyquinoline        | 1.450 | 1.08 | 0.02 | 0.58 | 1.1030 | 0.88  |
| Antipyrine                | 1.320 | 1.50 | 0.00 | 1.48 | 1.5502 | -1.14 |
| Benzotriazole             | 1.473 | 1.70 | 0.62 | 0.48 | 0.8642 | 0.58  |
| Purine                    | 1.320 | 1.58 | 0.56 | 0.78 | 0.8231 | -1.10 |
| Scopolamine               | 1.686 | 2.03 | 0.30 | 1.88 | 2.2321 | 0.28  |
| 5-Fluorouracil            | 0.720 | 0.84 | 0.57 | 1.02 | 0.7693 | -1.00 |
| Theobromine               | 1.500 | 1.60 | 0.50 | 1.38 | 1.2223 | -1.15 |
| Caffeine                  | 1.500 | 1.63 | 0.00 | 1.24 | 1.3632 | -1.30 |
| Guanine                   | 1.800 | 1.60 | 0.97 | 1.20 | 0.9816 | -1.70 |
| Morphine                  | 1.790 | 1.25 | 0.42 | 1.86 | 2.0648 | -0.68 |
| Codeine                   | 1.780 | 1.95 | 0.33 | 1.78 | 2.2057 | 0.19  |
| Heroin                    | 1.530 | 2.21 | 0.00 | 1.92 | 2.6598 | 0.70  |
| Hydromorphone             | 1.730 | 1.58 | 0.39 | 1.75 | 2.0648 | -0.43 |
| Nitrazepam                | 2.300 | 1.53 | 0.33 | 1.43 | 1.9848 | 1.57  |
| Progesterone              | 1.450 | 3.29 | 0.00 | 1.14 | 2.6215 | 2.78  |
| Testosterone              | 1.540 | 2.59 | 0.32 | 1.19 | 2.3827 | 1.94  |
| Deoxycorticosterone       | 1.740 | 3.50 | 0.14 | 1.31 | 2.6802 | 1.72  |
| Corticosterone            | 1.860 | 3.43 | 0.40 | 1.63 | 2.7389 | 0.66  |
| Cortisone                 | 1.960 | 3.50 | 0.36 | 1.87 | 2.7546 | 0.15  |
| Hydrocortisone            | 2.030 | 3.49 | 0.71 | 1.90 | 2.7976 | 0.21  |
| Prednisolone              | 2.210 | 3.10 | 0.71 | 1.92 | 2.7546 | 0.05  |
| Hydrocortisone-21-acetate | 1.890 | 2.88 | 0.46 | 2.16 | 3.0951 | 1.42  |

|                              |       |      |      |      |        |       |
|------------------------------|-------|------|------|------|--------|-------|
| Hydrocortisone-21-propanoate | 1.870 | 2.90 | 0.46 | 2.16 | 3.2360 | 1.98  |
| Hydrocortisone-21-butanoate  | 1.850 | 2.94 | 0.46 | 2.16 | 3.3769 | 2.39  |
| Hydrocortisone-21-pentanoate | 1.830 | 2.98 | 0.46 | 2.16 | 3.5178 | 2.96  |
| Hydrocortisone-21-hexanoate  | 1.810 | 3.02 | 0.46 | 2.16 | 3.6587 | 3.56  |
| Hydrocortisone-21-heptanoate | 1.790 | 3.03 | 0.46 | 2.16 | 3.7996 | 4.15  |
| Estrone                      | 1.730 | 2.05 | 0.50 | 1.08 | 2.1558 | 1.95  |
| Estratriol                   | 1.970 | 1.74 | 1.06 | 1.63 | 2.2575 | 0.89  |
| Cortisone-21-acetate         | 1.820 | 3.11 | 0.21 | 2.13 | 3.0521 | 1.40  |
| Dexamethasone                | 2.040 | 3.51 | 0.71 | 1.92 | 2.9132 | 0.82  |
| Phenylurea                   | 1.110 | 1.40 | 0.77 | 0.77 | 1.0726 | 0.04  |
| 5,5-Diphenylhydantoin        | 1.713 | 2.19 | 0.85 | 1.00 | 1.8693 | 1.48  |
| Benzylamine                  | 0.829 | 0.77 | 0.15 | 0.72 | 0.9570 | 0.37  |
| N-Methylbenzylamine          | 0.797 | 0.74 | 0.00 | 0.74 | 1.0980 | 0.78  |
| N-Ethyl-3-phenylpropylamine  | 0.750 | 0.82 | 0.08 | 0.89 | 1.5207 | 1.80  |
| N-Nitrosodimethylamine       | 0.393 | 1.19 | 0.00 | 0.56 | 0.6057 | -0.62 |
| N-Nitrosodiethylamine        | 0.345 | 1.08 | 0.00 | 0.59 | 0.8875 | 0.33  |
| N-Nitrosodiisopropylamine    | 0.300 | 0.95 | 0.00 | 0.67 | 1.1693 | 1.28  |
| N-Nitrosodibutylamine        | 0.300 | 0.98 | 0.00 | 0.64 | 1.4511 | 2.24  |
| N-Nitrosodiisobutylamine     | 0.300 | 0.88 | 0.00 | 0.74 | 1.4511 | 2.04  |
| N-Nitrosomethylethylamine    | 0.374 | 1.10 | 0.00 | 0.59 | 0.7466 | -0.25 |
| N-Nitrosomethylbutylamine    | 0.340 | 1.07 | 0.00 | 0.60 | 1.0284 | 0.65  |
| N-Nitrosomethylpentylamine   | 0.320 | 1.05 | 0.00 | 0.59 | 1.1693 | 1.43  |
| N-Nitrosoethylisopropylamine | 0.340 | 0.98 | 0.00 | 0.70 | 1.0284 | 0.85  |
| N-Nitrosoethylbutylamine     | 0.320 | 1.00 | 0.00 | 0.62 | 1.1693 | 1.41  |

|                            |       |      |      |      |        |       |
|----------------------------|-------|------|------|------|--------|-------|
| N-Nitrosopropylbutylamine  | 0.310 | 1.02 | 0.00 | 0.63 | 1.3102 | 1.84  |
| N-Nitrosopiperidine        | 0.592 | 1.33 | 0.00 | 0.54 | 0.9198 | 0.49  |
| N-Nitrosomorpholine        | 0.600 | 1.51 | 0.00 | 0.65 | 0.8376 | -0.37 |
| N-Nitrosomethylbenzylamine | 0.990 | 1.37 | 0.00 | 0.64 | 1.2135 | 1.53  |

**Table S2** Solute descriptors, and values of log P for partition between water and dry diethyl ether.

| Solute                   | E     | S    | A    | B    | V      | log P |
|--------------------------|-------|------|------|------|--------|-------|
| Argon                    | 0.000 | 0.00 | 0.00 | 0.00 | 0.1900 | 1.25  |
| Radon                    | 0.000 | 0.00 | 0.00 | 0.00 | 0.3840 | 1.76  |
| Hydrogen                 | 0.000 | 0.00 | 0.00 | 0.00 | 0.1086 | 0.88  |
| Oxygen                   | 0.000 | 0.00 | 0.00 | 0.00 | 0.1830 | 1.16  |
| Nitrogen                 | 0.000 | 0.00 | 0.00 | 0.00 | 0.2222 | 1.25  |
| Carbon monoxide          | 0.000 | 0.00 | 0.00 | 0.04 | 0.2220 | 1.22  |
| Methane                  | 0.000 | 0.00 | 0.00 | 0.00 | 0.2495 | 1.48  |
| Ethane                   | 0.000 | 0.00 | 0.00 | 0.00 | 0.3904 | 2.19  |
| 2-Methylpropane          | 0.000 | 0.00 | 0.00 | 0.00 | 0.6722 | 3.41  |
| Octane                   | 0.000 | 0.00 | 0.00 | 0.00 | 1.2358 | 6.03  |
| Cyclohexane              | 0.305 | 0.10 | 0.00 | 0.00 | 0.8454 | 3.97  |
| Dichloromethane          | 0.387 | 0.57 | 0.10 | 0.05 | 0.4943 | 1.88  |
| Tetrachloromethane       | 0.458 | 0.38 | 0.00 | 0.00 | 0.7391 | 3.28  |
| 1,2-Dichloroethane       | 0.416 | 0.64 | 0.10 | 0.11 | 0.6352 | 1.95  |
| 1,1,1-Trichloroethane    | 0.369 | 0.41 | 0.00 | 0.09 | 0.7576 | 2.89  |
| 1-Chlorobutane           | 0.210 | 0.40 | 0.00 | 0.10 | 0.7946 | 3.09  |
| 2-Chloro-2-methylpropane | 0.142 | 0.30 | 0.00 | 0.03 | 0.7946 | 3.28  |
| 2-Bromo-2-methylpropane  | 0.305 | 0.29 | 0.00 | 0.07 | 0.8472 | 3.42  |
| Iodoethane               | 0.640 | 0.40 | 0.00 | 0.15 | 0.6486 | 2.22  |
| Diethylether             | 0.041 | 0.25 | 0.00 | 0.45 | 0.7309 | 1.35  |
| Ethyl-tert-butylether    | 0.000 | 0.19 | 0.00 | 0.45 | 1.0130 | 1.98  |

|                              |       |      |      |      |        |       |
|------------------------------|-------|------|------|------|--------|-------|
| 1,4-Dioxane                  | 0.329 | 0.75 | 0.00 | 0.64 | 0.6810 | -0.32 |
| Propanone                    | 0.179 | 0.70 | 0.04 | 0.49 | 0.5470 | -0.26 |
| Butanone                     | 0.166 | 0.70 | 0.00 | 0.51 | 0.6879 | 0.31  |
| Acetonitrile                 | 0.237 | 0.90 | 0.07 | 0.32 | 0.4042 | -0.19 |
| Trimethylamine               | 0.140 | 0.20 | 0.00 | 0.67 | 0.6311 | -0.62 |
| Triethylamine                | 0.101 | 0.15 | 0.00 | 0.79 | 1.0538 | 0.90  |
| Nitromethane                 | 0.313 | 0.95 | 0.06 | 0.31 | 0.4237 | 0.14  |
| Methanol                     | 0.278 | 0.44 | 0.43 | 0.47 | 0.3082 | -1.26 |
| Hexadecan-1-ol               | 0.151 | 0.42 | 0.37 | 0.48 | 2.4220 | 7.89  |
| Octadecan-1-ol               | 0.145 | 0.42 | 0.37 | 0.48 | 2.7035 | 9.20  |
| Toluene                      | 0.601 | 0.52 | 0.00 | 0.14 | 0.8573 | 3.07  |
| trans-Stilbene               | 1.450 | 1.05 | 0.00 | 0.34 | 1.5630 | 5.29  |
| Biphenyl                     | 1.360 | 0.99 | 0.00 | 0.26 | 1.3242 | 4.35  |
| Naphthalene                  | 1.340 | 0.92 | 0.00 | 0.20 | 1.0854 | 3.96  |
| Anthracene                   | 2.290 | 1.34 | 0.00 | 0.28 | 1.4544 | 4.94  |
| Acenaphthene                 | 1.604 | 1.05 | 0.00 | 0.22 | 1.2586 | 4.51  |
| Fluoranthene                 | 2.377 | 1.55 | 0.00 | 0.24 | 1.5846 | 5.64  |
| Pyrene                       | 2.808 | 1.71 | 0.00 | 0.28 | 1.5846 | 5.58  |
| Hexafluorobenzene            | 0.088 | 0.65 | 0.00 | 0.00 | 0.8226 | 3.20  |
| 1,4-Dibromobenzene           | 1.150 | 0.86 | 0.00 | 0.04 | 1.0664 | 4.31  |
| Benzil                       | 1.445 | 1.59 | 0.00 | 0.62 | 1.6374 | 3.81  |
| 4-(Chloromethyl)nitrobenzene | 1.080 | 1.35 | 0.00 | 0.35 | 1.1539 | 3.02  |
| Benzoic acid                 | 0.730 | 0.90 | 0.59 | 0.40 | 0.9317 | 1.83  |
| 2-Hydroxybenzoic acid        | 0.890 | 0.84 | 0.71 | 0.38 | 0.9904 | 2.09  |

|                          |       |      |      |      |        |      |
|--------------------------|-------|------|------|------|--------|------|
| Methyl 4-hydroxybenzoate | 0.900 | 1.37 | 0.69 | 0.45 | 1.1313 | 1.73 |
| Diphenylsulfone          | 1.570 | 2.15 | 0.00 | 0.70 | 1.6051 | 2.62 |
| 4-Hydroxybenzoic acid    | 0.930 | 0.90 | 0.81 | 0.56 | 0.9904 | 1.17 |
| 3-Nitrobenzoic acid      | 0.990 | 1.08 | 0.76 | 0.52 | 1.1059 | 1.76 |

**Table S3** Solute descriptors and log P values for water to wet diisopropyl ether

| Solute                       | E     | S    | A    | B <sup>O</sup> | V      | log P |
|------------------------------|-------|------|------|----------------|--------|-------|
| Vanilin                      | 1.040 | 1.33 | 0.29 | 0.69           | 1.1313 | 0.60  |
| 1-Naphthylamine              | 1.670 | 1.26 | 0.20 | 0.57           | 1.1850 | 2.15  |
| Formic acid                  | 0.300 | 0.79 | 0.72 | 0.34           | 0.3239 | -0.84 |
| Estrone                      | 1.800 | 1.77 | 0.86 | 1.10           | 2.1988 | 2.30  |
| Water                        | 0.000 | 0.45 | 0.82 | 0.35           | 0.1673 | -2.00 |
| Acetic acid                  | 0.265 | 0.65 | 0.61 | 0.44           | 0.4648 | -0.74 |
| Resorcinol                   | 0.980 | 1.11 | 1.09 | 0.52           | 0.8338 | 0.28  |
| Estriol                      | 1.970 | 1.74 | 1.06 | 1.63           | 2.2575 | 0.00  |
| Pyruvic acid                 | 0.364 | 0.89 | 0.43 | 0.69           | 0.6214 | -1.22 |
| Propanoic acid               | 0.233 | 0.65 | 0.60 | 0.45           | 0.6057 | -0.09 |
| 2-Furaldehyde                | 0.690 | 1.50 | 0.00 | 0.44           | 0.6929 | 0.41  |
| 5-Methylfurfural             | 0.744 | 1.16 | 0.00 | 0.51           | 0.8339 | 0.63  |
| Atropine                     | 1.188 | 1.94 | 0.36 | 1.64           | 2.2820 | -0.03 |
| Dipropylnitrosoamine         | 0.318 | 1.00 | 0.00 | 0.63           | 1.1693 | 1.36  |
| N-Nitrosomethylpropylamine   | 0.360 | 1.03 | 0.00 | 0.60           | 0.8875 | 0.24  |
| Methylbutylnitrosoamine      | 0.340 | 1.08 | 0.00 | 0.59           | 1.0284 | 0.80  |
| N-Nitrosoethylbutylamine     | 0.320 | 1.00 | 0.00 | 0.63           | 1.1693 | 1.07  |
| N-Nitrosopropylbutylamine    | 0.310 | 0.99 | 0.00 | 0.64           | 1.3102 | 1.92  |
| N-Nitrosodibutylamine        | 0.300 | 0.98 | 0.00 | 0.65           | 1.4511 | 2.52  |
| N-Nitrosoethylisopropylamine | 0.340 | 1.02 | 0.00 | 0.65           | 1.0284 | 0.69  |
| N-Nitrosodiisopropylamine    | 0.300 | 0.95 | 0.00 | 0.67           | 1.1693 | 1.19  |
| N-Nitrosomethyl-t-           | 0.340 | 1.04 | 0.00 | 0.65           | 1.0284 | 0.55  |

butylamine

|                           |       |      |      |      |        |       |
|---------------------------|-------|------|------|------|--------|-------|
| N-Nitrosodiisobutylamine  | 0.300 | 0.78 | 0.00 | 0.75 | 1.4511 | 2.24  |
| N-Nitrosodiethylamine     | 0.345 | 1.08 | 0.00 | 0.59 | 0.8875 | 0.22  |
| N-Nitrosomethylethylamine | 0.374 | 1.12 | 0.00 | 0.58 | 0.7466 | -0.41 |
| N-Nitrosodimethylamine    | 0.393 | 1.19 | 0.00 | 0.55 | 0.6057 | -0.87 |
| Estradiol                 | 1.800 | 1.77 | 0.86 | 1.10 | 2.1988 | 2.30  |
| Butylamine                | 0.224 | 0.35 | 0.16 | 0.61 | 0.7720 | -0.04 |
| 2-Naphthylamine           | 1.670 | 1.28 | 0.22 | 0.55 | 1.1850 | 2.15  |
| Cyclohexylamine           | 0.326 | 0.56 | 0.16 | 0.58 | 0.9452 | 0.88  |
| Caffeine                  | 1.500 | 1.63 | 0.00 | 1.29 | 1.3632 | -1.19 |
| Valeric acid              | 0.205 | 0.60 | 0.60 | 0.45 | 0.8875 | 1.05  |
| Diethylamine              | 0.154 | 0.30 | 0.08 | 0.69 | 0.7720 | -0.21 |
| Cocaine                   | 1.355 | 1.92 | 0.00 | 1.50 | 2.2977 | 1.19  |
| Butanoic acid             | 0.210 | 0.62 | 0.60 | 0.45 | 0.7466 | 0.24  |
| Ethyl 4-aminobenzoate     | 1.034 | 1.20 | 0.32 | 0.76 | 1.3133 | 0.87  |
| Heptanoic acid            | 0.149 | 0.60 | 0.60 | 0.45 | 1.1693 | 2.29  |
| Catechol                  | 0.970 | 1.10 | 0.88 | 0.47 | 0.8338 | 0.62  |
| Phenol                    | 0.805 | 0.89 | 0.60 | 0.30 | 0.7751 | 1.12  |
| Hydroquinone              | 1.063 | 1.27 | 1.06 | 0.57 | 0.8338 | -0.13 |
| Lactic acid               | 0.343 | 0.63 | 0.69 | 0.67 | 0.6644 | -1.54 |
| Hexanoic acid             | 0.174 | 0.60 | 0.60 | 0.45 | 1.0284 | 1.48  |
| Trimethylamine            | 0.140 | 0.20 | 0.00 | 0.67 | 0.6311 | -0.36 |
| Glycolic acid             | 0.326 | 0.67 | 0.69 | 0.65 | 0.5235 | -1.70 |
| 4-Hydroxybenzaldehyde     | 1.010 | 1.54 | 0.85 | 0.37 | 0.9317 | 0.84  |



|          |       |      |      |      |        |      |
|----------|-------|------|------|------|--------|------|
| Pyridine | 0.631 | 0.84 | 0.00 | 0.47 | 0.6753 | 0.13 |
|----------|-------|------|------|------|--------|------|

**Table S4** Solute descriptors and log P values for water to dry THF

| Solute                 | <b>E</b> | <b>S</b> | <b>A</b> | <b>B</b> | <b>V</b> | log P |
|------------------------|----------|----------|----------|----------|----------|-------|
| Helium                 | 0.000    | 0.00     | 0.00     | 0.00     | 0.0680   | 0.39  |
| Neon                   | 0.000    | 0.00     | 0.00     | 0.00     | 0.0850   | 0.47  |
| Argon                  | 0.000    | 0.00     | 0.00     | 0.00     | 0.1900   | 0.91  |
| Krypton                | 0.000    | 0.00     | 0.00     | 0.00     | 0.2460   | 1.14  |
| Xenon                  | 0.000    | 0.00     | 0.00     | 0.00     | 0.3290   | 1.55  |
| Hydrogen               | 0.000    | 0.00     | 0.00     | 0.00     | 0.1086   | 0.65  |
| Deuterium              | 0.000    | 0.00     | 0.00     | 0.00     | 0.1100   | 0.65  |
| Oxygen                 | 0.000    | 0.00     | 0.00     | 0.00     | 0.1830   | 0.90  |
| Nitrogen               | 0.000    | 0.00     | 0.00     | 0.00     | 0.2222   | 0.97  |
| Carbon dioxide         | 0.000    | 0.28     | 0.05     | 0.10     | 0.2809   | 0.90  |
| Sulfur dioxide         | 0.370    | 0.66     | 0.28     | 0.10     | 0.3465   | 1.35  |
| Methane                | 0.000    | 0.00     | 0.00     | 0.00     | 0.2495   | 1.28  |
| Ethane                 | 0.000    | 0.00     | 0.00     | 0.00     | 0.3904   | 1.96  |
| Pentane                | 0.000    | 0.00     | 0.00     | 0.00     | 0.8131   | 4.03  |
| Hexane                 | 0.000    | 0.00     | 0.00     | 0.00     | 0.9540   | 4.66  |
| 2-Methylpentane        | 0.000    | 0.00     | 0.00     | 0.00     | 0.9540   | 4.54  |
| Heptane                | 0.000    | 0.00     | 0.00     | 0.00     | 1.0949   | 5.30  |
| 2,4-Dimethylpentane    | 0.000    | 0.00     | 0.00     | 0.00     | 1.0949   | 5.14  |
| Octane                 | 0.000    | 0.00     | 0.00     | 0.00     | 1.2358   | 5.96  |
| 2,5-Dimethylhexane     | 0.000    | 0.00     | 0.00     | 0.00     | 1.2358   | 5.55  |
| 2,2,4-Trimethylpentane | 0.000    | 0.00     | 0.00     | 0.00     | 1.2358   | 5.53  |
| 2,3,4-Trimethylpentane | 0.000    | 0.00     | 0.00     | 0.00     | 1.2358   | 5.47  |

|                                |       |       |      |      |        |      |
|--------------------------------|-------|-------|------|------|--------|------|
| Nonane                         | 0.000 | 0.00  | 0.00 | 0.00 | 1.3767 | 6.64 |
| Cyclohexane                    | 0.305 | 0.10  | 0.00 | 0.00 | 0.8454 | 3.69 |
| Methylcyclohexane              | 0.244 | 0.06  | 0.00 | 0.00 | 0.9863 | 4.67 |
| Ethylcyclohexane               | 0.263 | 0.10  | 0.00 | 0.00 | 1.1272 | 5.50 |
| Ethene                         | 0.107 | 0.10  | 0.00 | 0.07 | 0.3474 | 1.54 |
| Tetrafluoromethane             | 0.550 | -0.25 | 0.00 | 0.00 | 0.3203 | 1.55 |
| Dichloromethane                | 0.387 | 0.57  | 0.10 | 0.05 | 0.4943 | 2.17 |
| Trichloromethane               | 0.425 | 0.49  | 0.15 | 0.02 | 0.6167 | 2.97 |
| Tetrachloromethane             | 0.458 | 0.38  | 0.00 | 0.00 | 0.7391 | 3.47 |
| 1,2-Dichloroethane             | 0.416 | 0.64  | 0.10 | 0.11 | 0.6352 | 2.36 |
| 1,1,1-Trichloroethane          | 0.369 | 0.41  | 0.00 | 0.09 | 0.7576 | 3.05 |
| 2-Chloro-2-methylpropane       | 0.142 | 0.30  | 0.00 | 0.03 | 0.7946 | 3.30 |
| Tetrachloroethene              | 0.639 | 0.44  | 0.00 | 0.00 | 0.8370 | 4.05 |
| 2-Bromo-2-methylpropane        | 0.305 | 0.29  | 0.00 | 0.07 | 0.8472 | 3.44 |
| CF <sub>3</sub> CHBrCl         | 0.102 | 0.38  | 0.15 | 0.05 | 0.7410 | 3.59 |
| 1,1,2-Trifluorotrichloroethane | 0.010 | 0.13  | 0.00 | 0.00 | 0.8107 | 3.77 |
| 1,2-Difluorotetrachloroethane  | 0.227 | 0.33  | 0.00 | 0.02 | 0.9154 | 4.17 |
| Diethylether                   | 0.041 | 0.25  | 0.00 | 0.45 | 0.7309 | 1.40 |
| Tetrahydrofuran                | 0.289 | 0.52  | 0.00 | 0.48 | 0.6223 | 0.59 |
| 1,4-Dioxane                    | 0.329 | 0.75  | 0.00 | 0.64 | 0.6810 | 0.03 |
| Propionaldehyde                | 0.196 | 0.65  | 0.00 | 0.45 | 0.5470 | 0.28 |
| Butyraldehyde                  | 0.187 | 0.65  | 0.00 | 0.45 | 0.6879 | 0.91 |
| Propanone                      | 0.179 | 0.70  | 0.04 | 0.49 | 0.5470 | 0.06 |
| Butanone                       | 0.166 | 0.70  | 0.00 | 0.51 | 0.6879 | 0.61 |

|                       |       |       |      |      |        |       |
|-----------------------|-------|-------|------|------|--------|-------|
| Ethyl acetate         | 0.106 | 0.62  | 0.00 | 0.45 | 0.7466 | 1.18  |
| Methyl propanoate     | 0.128 | 0.60  | 0.00 | 0.45 | 0.7466 | 1.11  |
| Acetonitrile          | 0.237 | 0.90  | 0.07 | 0.32 | 0.4042 | 0.30  |
| Triethylamine         | 0.101 | 0.15  | 0.00 | 0.79 | 1.0538 | 1.01  |
| Nitromethane          | 0.313 | 0.95  | 0.06 | 0.31 | 0.4237 | 0.72  |
| N,N-Dimethylformamide | 0.367 | 1.31  | 0.00 | 0.74 | 0.6468 | -1.34 |
| Methanol              | 0.278 | 0.44  | 0.43 | 0.47 | 0.3082 | -0.90 |
| Ethanol               | 0.246 | 0.42  | 0.37 | 0.48 | 0.4491 | -0.33 |
| Propan-1-ol           | 0.236 | 0.42  | 0.37 | 0.48 | 0.5900 | 0.24  |
| Propan-2-ol           | 0.212 | 0.36  | 0.33 | 0.56 | 0.5900 | -0.04 |
| Sulfur hexafluoride   | 0.600 | -0.20 | 0.00 | 0.00 | 0.4643 | 2.19  |
| Tetramethyltin        | 0.100 | 0.08  | 0.00 | 0.05 | 1.0431 | 4.20  |
| Benzene               | 0.610 | 0.52  | 0.00 | 0.14 | 0.7164 | 2.85  |
| Toluene               | 0.601 | 0.52  | 0.00 | 0.14 | 0.8573 | 3.34  |
| Ethylbenzene          | 0.613 | 0.51  | 0.00 | 0.15 | 0.9982 | 3.85  |
| Propylbenzene         | 0.604 | 0.50  | 0.00 | 0.15 | 1.1391 | 4.48  |
| Isopropylbenzene      | 0.602 | 0.49  | 0.00 | 0.16 | 1.1391 | 4.55  |
| tert-Butylbenzene     | 0.619 | 0.49  | 0.00 | 0.18 | 1.2800 | 4.77  |
| trans-Stilbene        | 1.450 | 1.05  | 0.00 | 0.34 | 1.5630 | 5.85  |
| Naphthalene           | 1.340 | 0.92  | 0.00 | 0.20 | 1.0854 | 4.29  |
| Acenaphthene          | 1.604 | 1.05  | 0.00 | 0.22 | 1.2586 | 4.87  |
| Anthracene            | 2.290 | 1.34  | 0.00 | 0.28 | 1.4544 | 5.68  |
| Phenanthrene          | 2.055 | 1.29  | 0.00 | 0.29 | 1.4544 | 5.62  |
| Pyrene                | 2.808 | 1.71  | 0.00 | 0.28 | 1.5846 | 6.33  |

|                                    |       |      |      |      |        |      |
|------------------------------------|-------|------|------|------|--------|------|
| Fluorobenzene                      | 0.477 | 0.57 | 0.00 | 0.10 | 0.7341 | 3.03 |
| Hexafluorobenzene                  | 0.088 | 0.66 | 0.00 | 0.00 | 0.8226 | 3.37 |
| Chlorobenzene                      | 0.718 | 0.65 | 0.00 | 0.07 | 0.8388 | 3.61 |
| 1,2-Dichlorobenzene                | 0.872 | 0.78 | 0.00 | 0.04 | 0.9612 | 4.21 |
| Hexachlorobenzene                  | 1.490 | 0.99 | 0.00 | 0.00 | 1.4508 | 6.54 |
| Bromobenzene                       | 0.882 | 0.73 | 0.00 | 0.09 | 0.8914 | 3.66 |
| Iodobenzene                        | 1.188 | 0.82 | 0.00 | 0.12 | 0.9746 | 4.13 |
| Benzil                             | 1.445 | 1.59 | 0.00 | 0.62 | 1.6374 | 4.39 |
| 2-Hydroxybenzoic acid              | 0.890 | 0.84 | 0.71 | 0.38 | 0.9904 | 2.55 |
| Methyl 4-hydroxybenzoate           | 0.900 | 1.37 | 0.69 | 0.45 | 1.1313 | 2.30 |
| 4-Hydroxyacetanilide               | 1.060 | 1.63 | 1.04 | 0.86 | 1.1724 | 0.91 |
| Diphenylsulfone                    | 1.570 | 2.15 | 0.00 | 0.70 | 1.6051 | 3.52 |
| Piperidine                         | 0.422 | 0.46 | 0.13 | 0.68 | 0.8043 | 0.08 |
| p-Chloro-1-phenyl-3,3-dimethylurea | 1.140 | 1.50 | 0.47 | 0.78 | 1.4768 | 2.44 |
| Benzoic acid                       | 0.730 | 0.90 | 0.59 | 0.40 | 0.9317 | 2.18 |
| 4-Hydroxybenzoic acid              | 0.930 | 0.90 | 0.81 | 0.56 | 0.9904 | 1.56 |

**Table S5 Solute descriptors and log P values for partition from water into dry dioxane**

| Solute              | E     | S    | A    | B    | V      | Log P |
|---------------------|-------|------|------|------|--------|-------|
| Helium              | 0.000 | 0.00 | 0.00 | 0.00 | 0.0680 | 0.22  |
| Neon                | 0.000 | 0.00 | 0.00 | 0.00 | 0.0850 | 0.31  |
| Argon               | 0.000 | 0.00 | 0.00 | 0.00 | 0.1900 | 0.69  |
| Krypton             | 0.000 | 0.00 | 0.00 | 0.00 | 0.2460 | 0.91  |
| Xenon               | 0.000 | 0.00 | 0.00 | 0.00 | 0.3290 | 1.28  |
| Hydrogen            | 0.000 | 0.00 | 0.00 | 0.00 | 0.1086 | 0.43  |
| Deuterium           | 0.000 | 0.00 | 0.00 | 0.00 | 0.1100 | 0.48  |
| Oxygen              | 0.000 | 0.00 | 0.00 | 0.00 | 0.1830 | 0.69  |
| Nitrogen            | 0.000 | 0.00 | 0.00 | 0.00 | 0.2222 | 0.76  |
| Carbon dioxide      | 0.000 | 0.28 | 0.05 | 0.10 | 0.2809 | 0.93  |
| Sulfur dioxide      | 0.370 | 0.66 | 0.28 | 0.10 | 0.3465 | 0.97  |
| Methane             | 0.000 | 0.00 | 0.00 | 0.00 | 0.2495 | 1.06  |
| Ethane              | 0.000 | 0.00 | 0.00 | 0.00 | 0.3904 | 1.71  |
| Propane             | 0.000 | 0.00 | 0.00 | 0.00 | 0.5313 | 2.35  |
| Butane              | 0.000 | 0.00 | 0.00 | 0.00 | 0.6722 | 3.08  |
| Pentane             | 0.000 | 0.00 | 0.00 | 0.00 | 0.8131 | 3.59  |
| 2,2-Dimethylpropane | 0.000 | 0.00 | 0.00 | 0.00 | 0.8131 | 3.42  |
| Hexane              | 0.000 | 0.00 | 0.00 | 0.00 | 0.9540 | 4.15  |
| 2-Methylpentane     | 0.000 | 0.00 | 0.00 | 0.00 | 0.9540 | 4.03  |
| Heptane             | 0.000 | 0.00 | 0.00 | 0.00 | 1.0949 | 4.75  |
| 2,4-Dimethylpentane | 0.000 | 0.00 | 0.00 | 0.00 | 1.0949 | 4.56  |
| Octane              | 0.000 | 0.00 | 0.00 | 0.00 | 1.2358 | 5.35  |

|                          |       |       |      |      |        |      |
|--------------------------|-------|-------|------|------|--------|------|
| 2,5-Dimethylhexane       | 0.000 | 0.00  | 0.00 | 0.00 | 1.2358 | 4.94 |
| 2,3,4-Trimethylpentane   | 0.000 | 0.00  | 0.00 | 0.00 | 1.2358 | 4.90 |
| Nonane                   | 0.000 | 0.00  | 0.00 | 0.00 | 1.3767 | 5.99 |
| Cyclopropane             | 0.408 | 0.23  | 0.00 | 0.00 | 0.4227 | 1.97 |
| Cyclohexane              | 0.305 | 0.10  | 0.00 | 0.00 | 0.8454 | 3.55 |
| Methylcyclohexane        | 0.244 | 0.06  | 0.00 | 0.00 | 0.9863 | 4.25 |
| Ethylcyclohexane         | 0.263 | 0.10  | 0.00 | 0.00 | 1.1272 | 4.97 |
| Ethene                   | 0.107 | 0.10  | 0.00 | 0.07 | 0.3474 | 1.37 |
| Propene                  | 0.103 | 0.08  | 0.00 | 0.07 | 0.4883 | 1.97 |
| Buta-1,3-diene           | 0.320 | 0.23  | 0.00 | 0.10 | 0.5862 | 1.94 |
| Ethyne                   | 0.190 | 0.60  | 0.06 | 0.04 | 0.3044 | 1.25 |
| Propyne                  | 0.183 | 0.25  | 0.12 | 0.14 | 0.4453 | 1.45 |
| But-1-yne                | 0.178 | 0.25  | 0.12 | 0.10 | 0.5862 | 2.08 |
| But-1-en-3-yne           | 0.327 | 0.26  | 0.18 | 0.01 | 0.5432 | 2.38 |
| Tetrafluoromethane       | 0.550 | -0.25 | 0.00 | 0.00 | 0.3203 | 1.27 |
| Dichloromethane          | 0.387 | 0.57  | 0.10 | 0.05 | 0.4943 | 2.04 |
| Trichloromethane         | 0.425 | 0.49  | 0.15 | 0.02 | 0.6167 | 2.61 |
| Tetrachloromethane       | 0.458 | 0.38  | 0.00 | 0.00 | 0.7391 | 3.23 |
| 1,2-Dichloroethane       | 0.416 | 0.64  | 0.10 | 0.11 | 0.6352 | 2.34 |
| 2-Chloro-2-methylpropane | 0.142 | 0.30  | 0.00 | 0.03 | 0.7946 | 3.26 |
| Trichloroethene          | 0.524 | 0.37  | 0.08 | 0.03 | 0.7146 | 3.28 |
| Tetrachloroethene        | 0.639 | 0.44  | 0.00 | 0.00 | 0.8370 | 3.81 |
| 1,2-Dibromoethane        | 0.747 | 0.76  | 0.10 | 0.17 | 0.7400 | 2.57 |
| 2-Bromo-2-methylpropane  | 0.305 | 0.29  | 0.00 | 0.07 | 0.8472 | 3.39 |

|                               |       |       |      |      |        |       |
|-------------------------------|-------|-------|------|------|--------|-------|
| CF <sub>3</sub> CHBrCl        | 0.102 | 0.38  | 0.15 | 0.05 | 0.7410 | 3.15  |
| 1,2-Difluorotetrachloroethane | 0.227 | 0.33  | 0.00 | 0.02 | 0.9154 | 3.91  |
| Tetrahydropyran               | 0.296 | 0.49  | 0.00 | 0.48 | 0.7632 | 1.03  |
| 1,4-Dioxane                   | 0.329 | 0.75  | 0.00 | 0.64 | 0.6810 | 0.06  |
| Propanone                     | 0.179 | 0.70  | 0.04 | 0.49 | 0.5470 | 0.05  |
| Butanone                      | 0.166 | 0.70  | 0.00 | 0.51 | 0.6879 | 0.56  |
| Hexan-2-one                   | 0.136 | 0.68  | 0.00 | 0.51 | 0.9697 | 1.76  |
| 4-Methylpentan-2-one          | 0.111 | 0.65  | 0.00 | 0.51 | 0.9697 | 1.66  |
| Octan-2-one                   | 0.108 | 0.68  | 0.00 | 0.51 | 1.2515 | 2.90  |
| Ethyl acetate                 | 0.106 | 0.62  | 0.00 | 0.45 | 0.7466 | 1.13  |
| Acetonitrile                  | 0.237 | 0.90  | 0.07 | 0.32 | 0.4042 | 0.36  |
| Butylamine                    | 0.224 | 0.35  | 0.16 | 0.61 | 0.7720 | 0.07  |
| Triethylamine                 | 0.101 | 0.15  | 0.00 | 0.79 | 1.0538 | 0.62  |
| Nitromethane                  | 0.313 | 0.95  | 0.06 | 0.31 | 0.4237 | 0.76  |
| N,N-Dimethylformamide         | 0.367 | 1.31  | 0.00 | 0.74 | 0.6468 | -1.21 |
| Water                         | 0.000 | 0.45  | 0.82 | 0.35 | 0.1673 | -1.55 |
| Methanol                      | 0.278 | 0.44  | 0.43 | 0.47 | 0.3082 | -0.93 |
| Ethanol                       | 0.246 | 0.42  | 0.37 | 0.48 | 0.4491 | -0.51 |
| Propan-1-ol                   | 0.236 | 0.42  | 0.37 | 0.48 | 0.5900 | -0.25 |
| Propan-2-ol                   | 0.212 | 0.36  | 0.33 | 0.56 | 0.5900 | -0.28 |
| Butan-2-ol                    | 0.217 | 0.36  | 0.33 | 0.56 | 0.7309 | 0.67  |
| Cyclopentanol                 | 0.427 | 0.54  | 0.32 | 0.56 | 0.7630 | 0.61  |
| 2,2,2-Trifluoroethanol        | 0.015 | 0.60  | 0.57 | 0.25 | 0.5022 | 0.97  |
| Sulfur hexafluoride           | 0.600 | -0.20 | 0.00 | 0.00 | 0.4643 | 1.82  |



|                     |       |       |      |      |        |      |
|---------------------|-------|-------|------|------|--------|------|
| Carbon disulphide   | 0.876 | 0.26  | 0.00 | 0.03 | 0.4905 | 2.37 |
| Tetraethylsilane    | 0.132 | -0.22 | 0.00 | 0.13 | 1.4815 | 5.92 |
| Tetramethyltin      | 0.100 | 0.08  | 0.00 | 0.05 | 1.0431 | 4.05 |
| Tetraethyltin       | 0.010 | 0.12  | 0.00 | 0.10 | 1.6067 | 6.29 |
| Ferrocene           | 1.350 | 0.85  | 0.00 | 0.20 | 1.1209 | 4.35 |
| Benzene             | 0.610 | 0.52  | 0.00 | 0.14 | 0.7164 | 2.69 |
| Toluene             | 0.601 | 0.52  | 0.00 | 0.14 | 0.8573 | 3.16 |
| Ethylbenzene        | 0.613 | 0.51  | 0.00 | 0.15 | 0.9982 | 3.60 |
| trans-Stilbene      | 1.450 | 1.05  | 0.00 | 0.34 | 1.5630 | 5.66 |
| Biphenyl            | 1.360 | 0.99  | 0.00 | 0.26 | 1.3242 | 4.86 |
| Naphthalene         | 1.340 | 0.92  | 0.00 | 0.20 | 1.0854 | 4.12 |
| Acenaphthene        | 1.604 | 1.05  | 0.00 | 0.22 | 1.2586 | 4.72 |
| Anthracene          | 2.290 | 1.34  | 0.00 | 0.28 | 1.4544 | 5.42 |
| Phenanthrene        | 2.055 | 1.29  | 0.00 | 0.29 | 1.4544 | 5.51 |
| Fluoranthene        | 2.377 | 1.55  | 0.00 | 0.24 | 1.5846 | 6.11 |
| Pyrene              | 2.808 | 1.71  | 0.00 | 0.28 | 1.5846 | 6.05 |
| Fluorobenzene       | 0.477 | 0.57  | 0.00 | 0.10 | 0.7341 | 2.85 |
| Hexafluorobenzene   | 0.088 | 0.65  | 0.00 | 0.00 | 0.8226 | 3.17 |
| Chlorobenzene       | 0.718 | 0.65  | 0.00 | 0.07 | 0.8388 | 3.42 |
| 1,2-Dichlorobenzene | 0.872 | 0.78  | 0.00 | 0.04 | 0.9612 | 4.14 |
| Hexachlorobenzene   | 1.490 | 1.00  | 0.00 | 0.00 | 1.4508 | 6.34 |
| Benzyl chloride     | 0.821 | 0.86  | 0.00 | 0.14 | 0.9797 | 3.92 |
| Bromobenzene        | 0.882 | 0.73  | 0.00 | 0.09 | 0.8914 | 3.66 |
| Iodobenzene         | 1.188 | 0.82  | 0.00 | 0.12 | 0.9746 | 4.01 |

|                          |       |      |      |      |        |       |
|--------------------------|-------|------|------|------|--------|-------|
| Benzil                   | 1.445 | 1.59 | 0.00 | 0.62 | 1.6374 | 4.32  |
| Acetanilide              | 0.900 | 1.39 | 0.48 | 0.67 | 1.1137 | 1.54  |
| 2-Hydroxybenzoic acid    | 0.890 | 0.84 | 0.71 | 0.38 | 0.9904 | 2.44  |
| Methyl 4-hydroxybenzoate | 0.900 | 1.37 | 0.69 | 0.45 | 1.1313 | 2.20  |
| 4-Hydroxyacetanilide     | 1.060 | 1.63 | 1.04 | 0.86 | 1.1724 | 0.05  |
| Diphenylsulfone          | 1.570 | 2.15 | 0.00 | 0.70 | 1.6051 | 3.63  |
| Pyridine                 | 0.631 | 0.84 | 0.00 | 0.52 | 0.6753 | 0.73  |
| Piperidine               | 0.422 | 0.46 | 0.13 | 0.68 | 0.8043 | -0.12 |
| Benzoic acid             | 0.730 | 0.90 | 0.59 | 0.40 | 0.9317 | 2.09  |
| 4-Hydroxybenzoic acid    | 0.930 | 0.90 | 0.81 | 0.56 | 0.9904 | 1.46  |
| Morpholine               | 0.434 | 0.79 | 0.06 | 0.91 | 0.7221 | -1.07 |

**Table S6** Values of  $\log K^W$  and **L** used in the correlation equations

| Solute                   | Log K <sup>W</sup> | L      |
|--------------------------|--------------------|--------|
| Argon                    | -1.47              | -0.688 |
| Radon                    | -0.65              | 0.877  |
| Hydrogen                 | -1.72              | -1.200 |
| Oxygen                   | -1.51              | -0.723 |
| Nitrogen                 | -1.80              | -0.978 |
| Carbon monoxide          | -1.62              | -0.836 |
| Methane                  | -1.46              | -0.323 |
| Ethane                   | -1.34              | 0.492  |
| 2-Methylpropane          | -1.70              | 1.409  |
| Octane                   | -2.11              | 3.677  |
| Cyclohexane              | -0.90              | 2.964  |
| Dichloromethane          | 0.96               | 2.019  |
| Tetrachloromethane       | -0.06              | 2.823  |
| 1,2-Dichloroethane       | 1.31               | 2.573  |
| 1,1,1-Trichloroethane    | 0.14               | 2.733  |
| 1-Chlorobutane           | 0.12               | 2.722  |
| 2-Chloro-2-methylpropane | -0.80              | 2.273  |
| 2-Bromo-2-methylpropane  | -0.60              | 2.609  |
| Iodoethane               | 0.54               | 2.573  |
| Diethylether             | 1.17               | 2.015  |
| 1,4-Dioxane              | 3.71               | 2.892  |
| "Acetaldehyde "          | 2.57               | 1.230  |
| "Propionaldehyde "       | 2.52               | 1.815  |

|                        |   |       |       |
|------------------------|---|-------|-------|
| "Propanone             | " | 2.79  | 1.696 |
| "Methyl acetate        |   | 2.30  | 1.911 |
| "Ethyl acetate         | " | 2.16  | 2.314 |
| "Acetonitrile          | " | 2.85  | 1.739 |
| Ammonia                |   | 3.15  | 0.680 |
| Methylamine            |   | 3.34  | 1.300 |
| "Ethylamine            | " | 3.30  | 1.677 |
| "Propylamine           | " | 3.22  | 2.141 |
| "Butylamine            | " | 3.11  | 2.618 |
| "Hexylamine            | " | 2.90  | 3.655 |
| "Heptylamine           | " | 2.78  | 4.166 |
| Dimethylamine          |   | 3.15  | 1.600 |
| "Diethylamine          | " | 2.99  | 2.395 |
| "Dipropylamine         | " | 2.68  | 3.351 |
| "Trimethylamine        | " | 2.35  | 1.620 |
| "Triethylamine         | " | 2.36  | 3.040 |
| Nitromethane           |   | 2.95  | 1.892 |
| "Acetamide             | " | 7.50  | 2.825 |
| "N,N-Dimethylformamide | " | 5.73  | 3.173 |
| Urea                   |   | 10.00 | 3.320 |
| "Formic acid           | " | 5.25  | 1.400 |
| "Acetic acid           | " | 4.91  | 1.750 |
| "Propanoic acid        | " | 4.74  | 2.290 |
| "Butanoic acid         | " | 4.66  | 2.830 |

|                      |   |      |       |
|----------------------|---|------|-------|
| "Pentanoic acid      | " | 4.52 | 3.380 |
| "Hexanoic acid       | " | 4.56 | 3.920 |
| Methanol             |   | 3.74 | 0.970 |
| Ethanol              |   | 3.67 | 1.485 |
| "Propan-1-ol         | " | 3.56 | 2.031 |
| "Propan-2-ol         | " | 3.48 | 1.764 |
| "Butan-1-ol          | " | 3.46 | 2.601 |
| "2-Methylpropan-1-ol | " | 3.30 | 2.413 |
| "2-Methylpropan-2-ol | " | 3.28 | 1.963 |
| "Pentan-1-ol         | " | 3.35 | 3.106 |
| "Pentan-2-ol         | " | 3.22 | 2.840 |
| "Pentan-3-ol         | " | 3.19 | 2.860 |
| "2-Methylbutan-1-ol  | " | 3.24 | 3.011 |
| "3-Methylbutan-1-ol  | " | 3.24 | 3.011 |
| "2-Methylbutan-2-ol  | " | 3.25 | 2.630 |
| "Hexan-1-ol          | " | 3.23 | 3.610 |
| "Hexan-2-ol          | " | 3.07 | 3.340 |
| "2-Methylpentan-2-ol | " | 2.88 | 3.081 |
| "4-Methylpentan-2-ol | " | 2.74 | 3.179 |
| "3-Methylpentan-3-ol | " | 3.08 | 3.277 |
| "Heptan-1-ol         | " | 3.09 | 4.115 |
| Octan-1-ol           |   | 3.00 | 4.619 |
| Hexadecan-1-ol       |   | 2.02 | 8.671 |
| Octadecan-1-ol       |   | 1.78 | 9.680 |

|                     |   |       |       |
|---------------------|---|-------|-------|
| "Cyclopentanol      | " | 4.03  | 3.241 |
| "Cyclohexanol       | " | 4.01  | 3.758 |
| "Cycloheptanol      | " | 4.02  | 4.407 |
| "Prop-2-en-1-ol     | " | 3.69  | 1.951 |
| "2-Methoxyethanol   | " | 4.96  | 2.490 |
| 2-Ethoxyethanol     |   | 4.91  | 2.815 |
| Glycerol            |   | 6.23  | 3.200 |
| Hydrogen sulfide    |   | 0.40  | 0.659 |
| Benzene             |   | 0.63  | 2.786 |
| Toluene             |   | 0.65  | 3.325 |
| o-Xylene            |   | 0.66  | 3.939 |
| m-Xylene            |   | 0.61  | 3.839 |
| Trans-Stilbene      |   | 2.78  | 7.520 |
| Biphenyl            |   | 1.95  | 6.014 |
| Naphthalene         |   | 1.73  | 5.161 |
| Anthracene          |   | 3.03  | 7.568 |
| Phenanthrene        |   | 2.80  | 7.632 |
| Acenaphthene        |   | 2.36  | 6.469 |
| Fluoranthene        |   | 3.44  | 8.827 |
| Pyrene              |   | 3.50  | 8.833 |
| Hexafluorobenzene   |   | -0.07 | 2.537 |
| 1,3-Dichlorobenzene |   | 0.72  | 4.410 |
| 1,4-Dichlorobenzene |   | 0.74  | 4.435 |
| 1,4-Dibromobenzene  |   | 1.71  | 5.324 |

|                              |      |       |
|------------------------------|------|-------|
| Iodobenzene                  | 1.28 | 4.502 |
| Methylphenylether            | 1.80 | 3.890 |
| Benzaldehyde                 | 2.95 | 4.008 |
| Acetophenone                 | 3.36 | 4.501 |
| 4-Methoxyacetophenone        | 5.04 | 5.936 |
| Benzil                       | 4.87 | 7.611 |
| 4-(Chloromethyl)nitrobenzene | 3.77 | 5.806 |
| "Benzonitrile           "    | 3.09 | 4.039 |
| "Aniline                "    | 4.30 | 3.934 |
| 4-Chloroaniline              | 4.33 | 4.889 |
| "2-Nitroaniline       "      | 5.41 | 5.627 |
| "3-Nitroaniline       "      | 6.49 | 5.880 |
| "4-Nitroaniline       "      | 7.54 | 6.343 |
| "2-Nitrotoluene       "      | 2.63 | 4.878 |
| "Benzamide             "     | 8.07 | 5.767 |
| "Acetanilide           "     | 7.18 | 5.567 |
| Benzoic acid                 | 5.10 | 4.395 |
| "2-Chlorobenzoic acid   "    | 5.62 | 4.937 |
| "4-Chlorobenzoic acid   "    | 4.80 | 4.976 |
| "Phenylacetic acid     "     | 6.21 | 4.918 |
| "Phenol                "     | 4.85 | 3.766 |
| "2-Chlorophenol        "     | 3.34 | 4.178 |
| "2-Methoxyphenol       "     | 4.09 | 4.449 |
| "3-Methoxyphenol       "     | 5.62 | 4.803 |

|                            |   |      |       |
|----------------------------|---|------|-------|
| "3-Hydroxybenzaldehyde     | " | 6.97 | 5.069 |
| "4-Hydroxybenzaldehyde     | " | 6.48 | 5.533 |
| "2-Nitrophenol             | " | 3.36 | 4.760 |
| "3-Nitrophenol             | " | 7.06 | 5.692 |
| "4-Nitrophenol             | " | 7.81 | 5.876 |
| "2-Hydroxybenzoic acid     | " | 5.35 | 4.721 |
| "3-Hydroxybenzoic acid     | " | 7.00 | 4.860 |
| "4-Hydroxybenzoic acid     | " | 6.78 | 4.867 |
| Methyl 4-hydroxybenzoate   |   | 6.84 | 5.665 |
| "Catechol                  | " | 7.20 | 4.450 |
| "Resorcinol                | " | 8.35 | 4.618 |
| "Hydroquinone              | " | 8.87 | 4.827 |
| "4-Hydroxyacetanilide      | " | 6.43 | 6.430 |
| "Benzyl alcohol            | " | 4.86 | 4.221 |
| 2-Hydroxybenzyl alcohol    |   | 7.49 | 4.978 |
| "2-Phenylethanol           | " | 4.98 | 4.628 |
| "2-Furaldehyde             | " | 3.83 | 3.318 |
| Diphenylsulfone            |   | 7.39 | 8.902 |
| "Pyridine                  | " | 3.44 | 3.022 |
| "Pyridine                  | " | 3.44 | 3.022 |
| "Benzylamine               | " | 4.65 | 4.385 |
| "N-Nitrosodimethylamine    | " | 4.41 | 2.725 |
| "N-Nitrosodiethylamine     | " | 4.00 | 3.565 |
| "N-Nitrosodiisopropylamine | " | 3.78 | 4.393 |



|                                 |      |       |
|---------------------------------|------|-------|
| "N-Nitrosodibutylamine "        | 3.60 | 5.580 |
| "N-Nitrosodiisobutylamine "     | 3.55 | 5.241 |
| "N-Nitrosomethylethylamine "    | 4.20 | 3.174 |
| "N-Nitrosomethylbutylamine "    | 3.94 | 4.118 |
| "N-Nitrosomethylpentylamine "   | 3.70 | 4.498 |
| "N-Nitrosoethylisopropylamine " | 4.00 | 4.090 |
| "N-Nitrosoethylbutylamine "     | 3.85 | 4.655 |
| "N-Nitrosopropylbutylamine "    | 3.75 | 5.145 |
| "N-Nitrosopiperidine "          | 4.65 | 4.661 |
| "N-Nitrosomorpholine            | 5.70 | 4.202 |
| "N-Nitrosomethylbenzylamine     | 5.15 | 6.102 |
